# Supplementary material for: A quasi-classical trajectory study of the OH + SO reaction: the role of ro-vibrational energy
Source: Royal Society of Chemistry journal article supplement (doi:10.1039/c4cp01363h), 2014-01-01
Supplement: c4cp01363h1.pdf [file c4cp01363h1.pdf]

# ESI of the paper "A quasi-classical trajectory study of the OH + SO reaction: the role of ro-vibrational energy"

W. A. D. Pires, J. D Garrido, M. A. C. Nascimento, and M. Y. Ballester

Table 1: Results of trajectory calculations

| $v_{OH}, v_{SO}$ | $E_{tr}/$<br>kcal mol <sup>-1</sup> | $b_{max}/$<br>Å | QCT   |           |           |       | VEQMT <sub>C</sub> |           |           |       |
|------------------|-------------------------------------|-----------------|-------|-----------|-----------|-------|--------------------|-----------|-----------|-------|
|                  |                                     |                 | $N_T$ | $N_{com}$ | $N_{rec}$ | $N_r$ | $N_T$              | $N_{com}$ | $N_{rec}$ | $N_r$ |
| 1,0              | 0.199                               | 8.7             | 2000  | 1662      | 992       | 670   | 1681               | 1357      | 694       | 663   |
|                  | 0.396                               | 7.7             | 2000  | 1587      | 980       | 607   | 1680               | 1284      | 687       | 597   |
|                  | 0.596                               | 7.1             | 2000  | 1542      | 911       | 631   | 1696               | 1254      | 636       | 618   |
|                  | 0.993                               | 6.4             | 2000  | 1401      | 860       | 541   | 1704               | 1125      | 592       | 533   |
|                  | 1.987                               | 5.4             | 2000  | 1308      | 871       | 437   | 1695               | 1026      | 598       | 428   |
|                  | 5.962                               | 4.0             | 2000  | 1247      | 939       | 308   | 1727               | 1008      | 705       | 303   |
|                  | 9.936                               | 3.9             | 2000  | 1119      | 933       | 186   | 1760               | 912       | 729       | 183   |
| 2,0              | 0.199                               | 8.7             | 2000  | 1589      | 1001      | 588   | 1895               | 1496      | 909       | 587   |
|                  | 0.396                               | 7.7             | 2000  | 1496      | 900       | 596   | 1894               | 1405      | 810       | 595   |
|                  | 0.596                               | 7.1             | 2000  | 1488      | 940       | 548   | 1897               | 1393      | 847       | 546   |
|                  | 0.993                               | 6.4             | 2000  | 1354      | 841       | 513   | 1894               | 1259      | 746       | 513   |
|                  | 1.987                               | 5.4             | 2000  | 1298      | 812       | 486   | 1901               | 1218      | 733       | 485   |
|                  | 5.962                               | 4.0             | 2000  | 1242      | 895       | 347   | 1892               | 1158      | 815       | 343   |
|                  | 9.936                               | 4.1             | 2000  | 1034      | 814       | 220   | 1903               | 963       | 746       | 217   |
| 3,0              | 0.199                               | 8.7             | 2000  | 1544      | 762       | 782   | 1968               | 1522      | 740       | 782   |
|                  | 0.396                               | 7.7             | 2000  | 1475      | 757       | 718   | 1951               | 1432      | 714       | 718   |
|                  | 0.596                               | 7.1             | 2000  | 1446      | 731       | 715   | 1948               | 1410      | 695       | 715   |
|                  | 0.993                               | 6.4             | 2000  | 1314      | 652       | 662   | 1964               | 1291      | 629       | 662   |
|                  | 1.987                               | 5.4             | 2000  | 1269      | 694       | 575   | 1952               | 1235      | 660       | 575   |
|                  | 5.962                               | 4.0             | 2000  | 1243      | 731       | 512   | 1945               | 1208      | 696       | 512   |
|                  | 9.936                               | 4.1             | 2000  | 1036      | 641       | 395   | 1934               | 996       | 602       | 394   |
| 4,0              | 0.199                               | 8.7             | 2000  | 1510      | 396       | 1114  | 1984               | 1498      | 384       | 1114  |
|                  | 0.396                               | 7.7             | 2000  | 1456      | 366       | 1090  | 1983               | 1443      | 353       | 1090  |
|                  | 0.596                               | 7.1             | 2000  | 1408      | 369       | 1039  | 1975               | 1391      | 352       | 1039  |
|                  | 0.993                               | 6.4             | 2000  | 1298      | 325       | 973   | 1980               | 1290      | 317       | 973   |
|                  | 1.987                               | 5.4             | 2000  | 1221      | 346       | 875   | 1979               | 1210      | 335       | 875   |
|                  | 5.962                               | 4.0             | 2000  | 1223      | 417       | 806   | 1975               | 1208      | 402       | 806   |
|                  | 9.936                               | 4.4             | 2000  | 873       | 338       | 535   | 1974               | 862       | 327       | 535   |

Continued on next page

Table 1 – continued from previous page

| $v_{\text{OH}}, v_{\text{SO}}$ | $E_{tr}/$<br>kcal mol <sup>-1</sup> | $b_{max}/$<br>Å | QCT   |           |           |       | VEQMT <sub>C</sub> |           |           |       |
|--------------------------------|-------------------------------------|-----------------|-------|-----------|-----------|-------|--------------------|-----------|-----------|-------|
|                                |                                     |                 | $N_T$ | $N_{com}$ | $N_{rec}$ | $N_r$ | $N_T$              | $N_{com}$ | $N_{rec}$ | $N_r$ |
| 5, 0                           | 0.199                               | 8.7             | 2000  | 1522      | 177       | 1345  | 1987               | 1515      | 170       | 1345  |
|                                | 0.396                               | 7.7             | 2000  | 1445      | 180       | 1265  | 1990               | 1440      | 175       | 1265  |
|                                | 0.596                               | 7.1             | 2000  | 1385      | 194       | 1191  | 1992               | 1384      | 193       | 1191  |
|                                | 0.993                               | 6.4             | 2000  | 1264      | 182       | 1082  | 1995               | 1260      | 179       | 1081  |
|                                | 1.987                               | 5.4             | 2000  | 1186      | 146       | 1040  | 1993               | 1180      | 140       | 1040  |
|                                | 5.962                               | 4.0             | 2000  | 1198      | 186       | 1012  | 1975               | 1196      | 184       | 1012  |
|                                | 9.936                               | 4.7             | 2000  | 734       | 154       | 580   | 1984               | 728       | 148       | 580   |
| 0, 1                           | 0.199                               | 9.0             | 2000  | 1602      | 767       | 835   | 1327               | 994       | 182       | 812   |
|                                | 0.396                               | 7.8             | 1999  | 1611      | 798       | 813   | 1312               | 985       | 201       | 784   |
|                                | 0.596                               | 7.2             | 2000  | 1545      | 763       | 782   | 1336               | 948       | 199       | 749   |
|                                | 0.993                               | 6.6             | 1999  | 1369      | 723       | 646   | 1357               | 800       | 183       | 617   |
|                                | 1.987                               | 5.6             | 1999  | 1234      | 745       | 489   | 1362               | 667       | 202       | 465   |
|                                | 5.962                               | 4.2             | 2000  | 1148      | 884       | 264   | 1396               | 616       | 365       | 251   |
|                                | 9.936                               | 3.7             | 2000  | 1174      | 1011      | 163   | 1468               | 699       | 543       | 156   |
| 0, 2                           | 0.199                               | 8.8             | 2000  | 1634      | 1047      | 587   | 1407               | 1062      | 481       | 581   |
|                                | 0.396                               | 7.8             | 2000  | 1553      | 990       | 563   | 1458               | 1041      | 489       | 552   |
|                                | 0.596                               | 7.2             | 2000  | 1527      | 978       | 549   | 1464               | 1014      | 479       | 535   |
|                                | 0.993                               | 6.5             | 2000  | 1416      | 936       | 480   | 1510               | 946       | 476       | 470   |
|                                | 1.987                               | 5.6             | 2000  | 1220      | 880       | 340   | 1508               | 748       | 419       | 329   |
|                                | 5.962                               | 4.1             | 2000  | 1177      | 944       | 233   | 1585               | 778       | 549       | 229   |
|                                | 9.936                               | 3.9             | 2000  | 1103      | 983       | 120   | 1612               | 727       | 612       | 115   |
| 0, 3                           | 0.199                               | 8.8             | 2000  | 1617      | 1128      | 489   | 1563               | 1192      | 714       | 478   |
|                                | 0.396                               | 7.9             | 2000  | 1560      | 1132      | 428   | 1563               | 1127      | 703       | 424   |
|                                | 0.596                               | 7.2             | 2000  | 1506      | 1067      | 439   | 1574               | 1084      | 652       | 432   |
|                                | 0.993                               | 6.4             | 2000  | 1424      | 1043      | 381   | 1578               | 1015      | 639       | 376   |
|                                | 1.987                               | 5.6             | 2000  | 1200      | 893       | 307   | 1650               | 861       | 556       | 305   |
|                                | 5.962                               | 4.2             | 2000  | 1112      | 926       | 186   | 1709               | 829       | 649       | 180   |
|                                | 9.936                               | 3.9             | 2000  | 1081      | 976       | 105   | 1741               | 825       | 722       | 103   |
| 0, 4                           | 0.199                               | 8.7             | 2000  | 1611      | 1218      | 393   | 1680               | 1298      | 907       | 391   |
|                                | 0.396                               | 7.7             | 2000  | 1556      | 1175      | 381   | 1688               | 1247      | 868       | 379   |
|                                | 0.596                               | 7.2             | 2000  | 1460      | 1093      | 367   | 1692               | 1156      | 794       | 362   |
|                                | 0.993                               | 6.4             | 2000  | 1418      | 1097      | 321   | 1694               | 1117      | 801       | 316   |
|                                | 1.987                               | 5.6             | 2000  | 1175      | 919       | 256   | 1727               | 905       | 651       | 254   |
|                                | 5.962                               | 4.4             | 2000  | 1020      | 883       | 137   | 1803               | 824       | 688       | 136   |
|                                | 9.936                               | 4.0             | 2000  | 1018      | 930       | 88    | 1830               | 850       | 763       | 87    |

Continued on next page

Table 1 – continued from previous page

| $v_{\text{OH}}, v_{\text{SO}}$ | $E_{tr}/$<br>kcal mol <sup>-1</sup> | $b_{max}/$<br>Å | QCT   |           |           |       | VEQMT <sub>C</sub> |           |           |       |
|--------------------------------|-------------------------------------|-----------------|-------|-----------|-----------|-------|--------------------|-----------|-----------|-------|
|                                |                                     |                 | $N_T$ | $N_{com}$ | $N_{rec}$ | $N_r$ | $N_T$              | $N_{com}$ | $N_{rec}$ | $N_r$ |
| 0, 5                           | 0.199                               | 8.7             | 2000  | 1597      | 1216      | 381   | 1744               | 1345      | 967       | 378   |
|                                | 0.396                               | 7.8             | 2000  | 1483      | 1163      | 320   | 1775               | 1260      | 940       | 320   |
|                                | 0.596                               | 7.2             | 2000  | 1418      | 1138      | 280   | 1766               | 1185      | 905       | 280   |
|                                | 0.993                               | 6.5             | 2000  | 1329      | 1057      | 272   | 1777               | 1106      | 834       | 272   |
|                                | 1.987                               | 5.6             | 2000  | 1164      | 922       | 242   | 1806               | 973       | 732       | 241   |
|                                | 5.962                               | 4.4             | 2000  | 1012      | 875       | 137   | 1860               | 873       | 738       | 135   |
|                                | 9.936                               | 4.0             | 2000  | 1000      | 877       | 123   | 1874               | 874       | 753       | 121   |
| 0, 6                           | 0.199                               | 8.6             | 2000  | 1576      | 1299      | 277   | 1803               | 1380      | 1103      | 277   |
|                                | 0.396                               | 7.8             | 2000  | 1461      | 1192      | 269   | 1829               | 1291      | 1023      | 268   |
|                                | 0.596                               | 7.2             | 2000  | 1403      | 1136      | 267   | 1832               | 1237      | 971       | 266   |
|                                | 0.993                               | 6.5             | 2000  | 1292      | 1053      | 239   | 1826               | 1120      | 881       | 239   |
|                                | 1.987                               | 5.6             | 2000  | 1146      | 946       | 200   | 1868               | 1016      | 816       | 200   |
|                                | 5.962                               | 4.4             | 2000  | 1018      | 883       | 135   | 1911               | 929       | 794       | 135   |
|                                | 9.936                               | 4.0             | 2000  | 997       | 898       | 99    | 1901               | 900       | 803       | 97    |
| 0, 7                           | 0.199                               | 8.6             | 2000  | 1563      | 1311      | 252   | 1882               | 1446      | 1194      | 252   |
|                                | 0.396                               | 7.8             | 2000  | 1424      | 1201      | 223   | 1864               | 1288      | 1065      | 223   |
|                                | 0.596                               | 7.2             | 2000  | 1386      | 1153      | 233   | 1859               | 1246      | 1013      | 233   |
|                                | 0.993                               | 6.5             | 2000  | 1281      | 1056      | 225   | 1887               | 1168      | 943       | 225   |
|                                | 1.987                               | 5.6             | 2000  | 1083      | 909       | 174   | 1905               | 988       | 814       | 174   |
|                                | 5.962                               | 4.5             | 2000  | 938       | 797       | 141   | 1925               | 863       | 723       | 140   |
|                                | 9.936                               | 4.0             | 2000  | 959       | 845       | 114   | 1938               | 897       | 784       | 113   |
| 0, 8                           | 0.199                               | 8.5             | 2000  | 1513      | 1302      | 211   | 1907               | 1420      | 1209      | 211   |
|                                | 0.396                               | 7.8             | 2000  | 1405      | 1164      | 241   | 1894               | 1300      | 1060      | 240   |
|                                | 0.596                               | 7.2             | 2000  | 1352      | 1134      | 218   | 1909               | 1262      | 1044      | 218   |
|                                | 0.993                               | 6.6             | 2000  | 1179      | 983       | 196   | 1929               | 1108      | 912       | 196   |
|                                | 1.987                               | 5.6             | 2000  | 1090      | 957       | 133   | 1903               | 993       | 860       | 133   |
|                                | 5.962                               | 4.5             | 2000  | 931       | 826       | 105   | 1956               | 887       | 782       | 105   |
|                                | 9.936                               | 4.0             | 2000  | 944       | 842       | 102   | 1958               | 902       | 800       | 102   |
| 0, 9                           | 0.199                               | 8.5             | 2000  | 1468      | 1260      | 208   | 1925               | 1393      | 1185      | 208   |
|                                | 0.396                               | 7.8             | 2000  | 1381      | 1174      | 207   | 1942               | 1323      | 1118      | 205   |
|                                | 0.596                               | 7.2             | 2000  | 1332      | 1126      | 206   | 1930               | 1262      | 1057      | 205   |
|                                | 0.993                               | 6.6             | 2000  | 1165      | 983       | 182   | 1954               | 1119      | 937       | 182   |
|                                | 1.987                               | 5.6             | 2000  | 1079      | 939       | 140   | 1956               | 1035      | 896       | 139   |
|                                | 5.962                               | 4.6             | 2000  | 888       | 785       | 103   | 1961               | 849       | 746       | 103   |
|                                | 9.936                               | 4.0             | 2000  | 923       | 834       | 89    | 1977               | 900       | 812       | 88    |

Continued on next page

Table 1 – continued from previous page

| $v_{\text{OH}}, v_{\text{SO}}$ | $E_{tr}/$<br>kcal mol <sup>-1</sup> | $b_{max}/$<br>Å | QCT   |           |           |       | VEQMT <sub>C</sub> |           |           |       |
|--------------------------------|-------------------------------------|-----------------|-------|-----------|-----------|-------|--------------------|-----------|-----------|-------|
|                                |                                     |                 | $N_T$ | $N_{com}$ | $N_{rec}$ | $N_r$ | $N_T$              | $N_{com}$ | $N_{rec}$ | $N_r$ |
| 0, 10                          | 0.199                               | 8.5             | 2000  | 1479      | 1284      | 195   | 1957               | 1436      | 1241      | 195   |
|                                | 0.396                               | 7.8             | 2000  | 1330      | 1149      | 181   | 1953               | 1283      | 1102      | 181   |
|                                | 0.596                               | 7.2             | 2000  | 1273      | 1099      | 174   | 1959               | 1232      | 1059      | 173   |
|                                | 0.993                               | 6.6             | 2000  | 1108      | 954       | 154   | 1953               | 1061      | 909       | 152   |
|                                | 1.987                               | 5.6             | 2000  | 1037      | 880       | 157   | 1961               | 998       | 841       | 157   |
|                                | 5.962                               | 4.6             | 2000  | 868       | 762       | 106   | 1979               | 847       | 741       | 106   |
|                                | 9.936                               | 4.0             | 2000  | 917       | 846       | 71    | 1986               | 903       | 832       | 71    |
| 0, 11                          | 0.199                               | 8.6             | 2000  | 1439      | 1234      | 205   | 1967               | 1406      | 1201      | 205   |
|                                | 0.396                               | 7.8             | 2000  | 1303      | 1120      | 183   | 1955               | 1258      | 1075      | 183   |
|                                | 0.596                               | 7.4             | 2000  | 1199      | 1026      | 173   | 1968               | 1167      | 994       | 173   |
|                                | 0.993                               | 6.5             | 2000  | 1118      | 958       | 160   | 1965               | 1083      | 924       | 159   |
|                                | 1.987                               | 5.5             | 2000  | 1043      | 926       | 117   | 1979               | 1022      | 905       | 117   |
|                                | 5.962                               | 4.4             | 2000  | 923       | 803       | 120   | 1983               | 906       | 786       | 120   |
|                                | 9.936                               | 4.0             | 2000  | 899       | 827       | 72    | 1979               | 878       | 807       | 71    |
| 0, 12                          | 0.199                               | 8.7             | 2000  | 1394      | 1197      | 197   | 1984               | 1378      | 1181      | 197   |
|                                | 0.396                               | 7.8             | 2000  | 1260      | 1105      | 155   | 1976               | 1236      | 1081      | 155   |
|                                | 0.596                               | 7.3             | 2000  | 1180      | 1024      | 156   | 1981               | 1161      | 1005      | 156   |
|                                | 0.993                               | 6.7             | 2000  | 1007      | 860       | 147   | 1986               | 993       | 846       | 147   |
|                                | 1.987                               | 5.7             | 2000  | 960       | 837       | 123   | 1986               | 946       | 823       | 123   |
|                                | 5.962                               | 4.3             | 2000  | 942       | 837       | 105   | 1984               | 926       | 821       | 105   |
|                                | 9.936                               | 4.0             | 2000  | 890       | 803       | 87    | 1991               | 881       | 794       | 87    |
| 0, 13                          | 0.199                               | 8.6             | 2000  | 1363      | 1173      | 190   | 1983               | 1346      | 1156      | 190   |
|                                | 0.396                               | 7.9             | 2000  | 1184      | 1029      | 155   | 1982               | 1166      | 1011      | 155   |
|                                | 0.596                               | 7.3             | 2000  | 1148      | 998       | 150   | 1990               | 1138      | 988       | 150   |
|                                | 0.993                               | 6.7             | 2000  | 1009      | 888       | 121   | 1994               | 1003      | 882       | 121   |
|                                | 1.987                               | 5.7             | 2000  | 943       | 823       | 120   | 1991               | 934       | 814       | 120   |
|                                | 5.962                               | 4.7             | 2000  | 786       | 695       | 91    | 1990               | 776       | 685       | 91    |
|                                | 9.936                               | 4.0             | 2000  | 875       | 782       | 93    | 1998               | 873       | 780       | 93    |
| 1, 1                           | 0.199                               | 9.0             | 2000  | 1564      | 1024      | 540   | 1797               | 1366      | 829       | 537   |
|                                | 0.396                               | 8.2             | 2000  | 1405      | 932       | 473   | 1816               | 1230      | 758       | 472   |
|                                | 0.596                               | 7.2             | 2000  | 1497      | 993       | 504   | 1785               | 1288      | 791       | 497   |
|                                | 0.993                               | 6.6             | 2000  | 1318      | 893       | 425   | 1813               | 1138      | 721       | 417   |
|                                | 1.987                               | 5.9             | 2000  | 1071      | 752       | 319   | 1817               | 900       | 583       | 317   |
|                                | 5.962                               | 4.4             | 2000  | 1078      | 854       | 224   | 1844               | 927       | 706       | 221   |
|                                | 9.936                               | 4.0             | 2000  | 1071      | 923       | 148   | 1831               | 915       | 767       | 148   |

Continued on next page

Table 1 – continued from previous page

| $v_{\text{OH}}, v_{\text{SO}}$ | $E_{tr}/$<br>kcal mol <sup>-1</sup> | $b_{max}/$<br>Å | QCT   |           |           |       | VEQMT <sub>C</sub> |           |           |       |
|--------------------------------|-------------------------------------|-----------------|-------|-----------|-----------|-------|--------------------|-----------|-----------|-------|
|                                |                                     |                 | $N_T$ | $N_{com}$ | $N_{rec}$ | $N_r$ | $N_T$              | $N_{com}$ | $N_{rec}$ | $N_r$ |
| 2, 1                           | 0.199                               | 8.8             | 2000  | 1539      | 960       | 579   | 1938               | 1483      | 905       | 578   |
|                                | 0.396                               | 7.9             | 2000  | 1451      | 971       | 480   | 1938               | 1398      | 919       | 479   |
|                                | 0.596                               | 7.3             | 2000  | 1384      | 900       | 484   | 1932               | 1324      | 842       | 482   |
|                                | 0.993                               | 6.7             | 2000  | 1244      | 813       | 431   | 1947               | 1191      | 760       | 431   |
|                                | 1.987                               | 5.7             | 2000  | 1156      | 782       | 374   | 1929               | 1089      | 716       | 373   |
|                                | 5.962                               | 4.4             | 2000  | 1089      | 778       | 311   | 1937               | 1034      | 723       | 311   |
|                                | 9.936                               | 4.0             | 2000  | 1078      | 843       | 235   | 1932               | 1018      | 784       | 234   |
| 3, 1                           | 0.199                               | 8.9             | 2000  | 1468      | 747       | 721   | 1971               | 1447      | 726       | 721   |
|                                | 0.396                               | 8.0             | 2000  | 1354      | 705       | 649   | 1985               | 1340      | 691       | 649   |
|                                | 0.596                               | 7.3             | 2000  | 1363      | 720       | 643   | 1969               | 1337      | 695       | 642   |
|                                | 0.993                               | 6.7             | 2000  | 1209      | 634       | 575   | 1977               | 1190      | 615       | 575   |
|                                | 1.987                               | 5.6             | 2000  | 1162      | 631       | 531   | 1976               | 1144      | 613       | 531   |
|                                | 5.962                               | 4.5             | 2000  | 1032      | 610       | 422   | 1971               | 1006      | 584       | 422   |
|                                | 9.936                               | 4.1             | 2000  | 1008      | 648       | 360   | 1968               | 984       | 624       | 360   |
| 2, 4                           | 0.199                               | 8.8             | 2000  | 1477      | 1040      | 437   | 1979               | 1456      | 1019      | 437   |
|                                | 0.396                               | 8.1             | 2000  | 1305      | 969       | 336   | 1981               | 1286      | 951       | 335   |
|                                | 0.596                               | 7.4             | 2000  | 1320      | 949       | 371   | 1976               | 1296      | 927       | 369   |
|                                | 0.993                               | 6.6             | 2000  | 1230      | 872       | 358   | 1979               | 1209      | 851       | 358   |
|                                | 1.987                               | 5.6             | 2000  | 1143      | 833       | 310   | 1981               | 1124      | 814       | 310   |
|                                | 5.962                               | 4.4             | 2000  | 1029      | 786       | 243   | 1985               | 1014      | 771       | 243   |
|                                | 9.936                               | 4.0             | 2000  | 1038      | 821       | 217   | 1982               | 1020      | 803       | 217   |
